# Supplementary material for: Unusual calcination temperature dependent tetragonal–monoclinic transitions in rare earth-doped zirconia nanocrystals
Source: Royal Society of Chemistry journal article supplement (doi:10.1039/b304966c), 2003-01-01
Supplement: b304966c.doc [file b304966c.doc]

#### Supplementary Information for *b304966c*

**Unusual calcination temperature dependent tetragonal-monoclinic transitions in rare earth-doped zirconia nanocrystals**

Gang Xu, Ya-Wen Zhang, Bo Han, Mei-Jun Li, Can Li, and Chun-Hua Yan


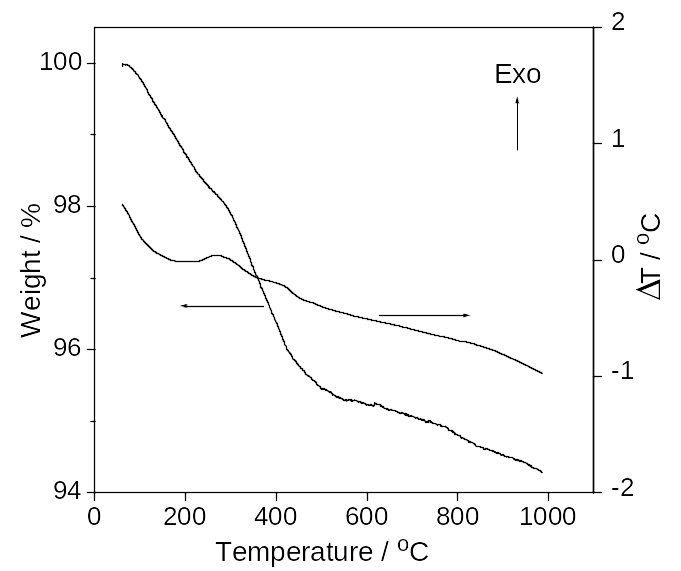


**Figure 1S** Combined TG-DTA run of the as-prepared 2ScSZ powders.

**Figure 2S** Microstrain of tetragonal phase and monoclinic phases versus calcination temperature for the as-calcined 2YSZ powders.


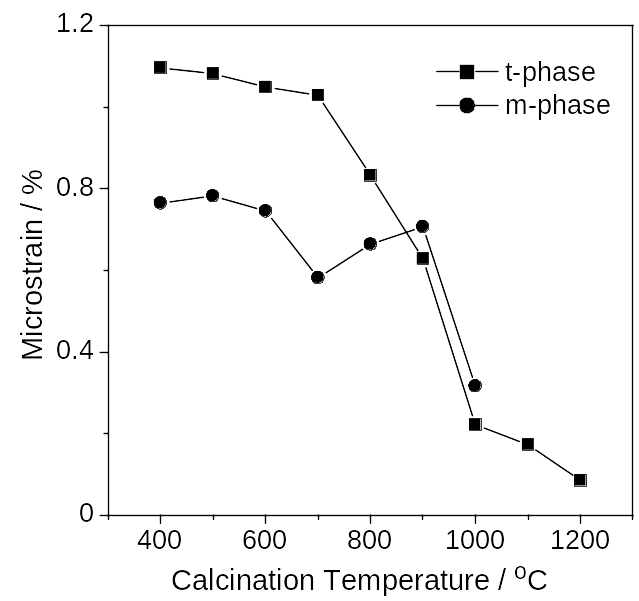


**Figure 3S** FT Raman (a) and UV Raman (b) spectra of the 2YSZ powders calcined over 400~1400 C

**Figure 4S** *In situ* HTXRD patterns of the as-prepared 2YSZ powders.

(111)*m*

(111)*t*

(111)*m*


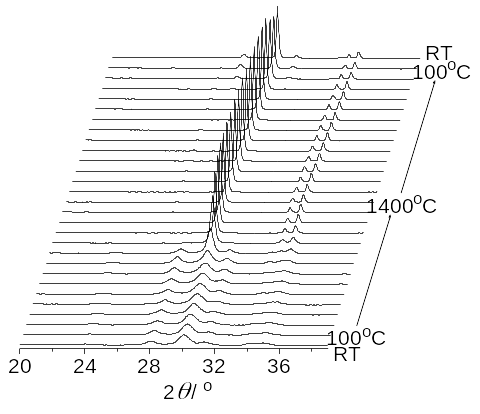


Tetragonal

Monoclinic

Calcination Temperature

400 C

1400 C

**Figure 5S** Schematic diagram of the *t*-*m* transitions characteristics for the 2YSZ powders *versus* calcination temperatures.
